# Supplementary material for: Selection, identification and application of a DNA aptamer against Staphylococcus aureus enterotoxin A
Source: Royal Society of Chemistry journal article supplement (doi:10.1039/c3ay41576g), 2013-12-11
Supplement: c3ay41576g.pdf [file c3ay41576g.pdf]

## Supporting information for

### Selection, identification and application of a DNA aptamer against *Staphylococcus aureus* enterotoxin A

*Yukun Huang, Xiujuan Chen, Yu Xia,\* Shijia Wu, Nuo Duan, Xiaoyuan Ma, Zhouping Wang\**

State Key Laboratory of Food Science and Technology, Synergetic Innovation Center of Food Safety and Nutrition, School of Food Science and Technology, Jiangnan University, Wuxi 214122, China.

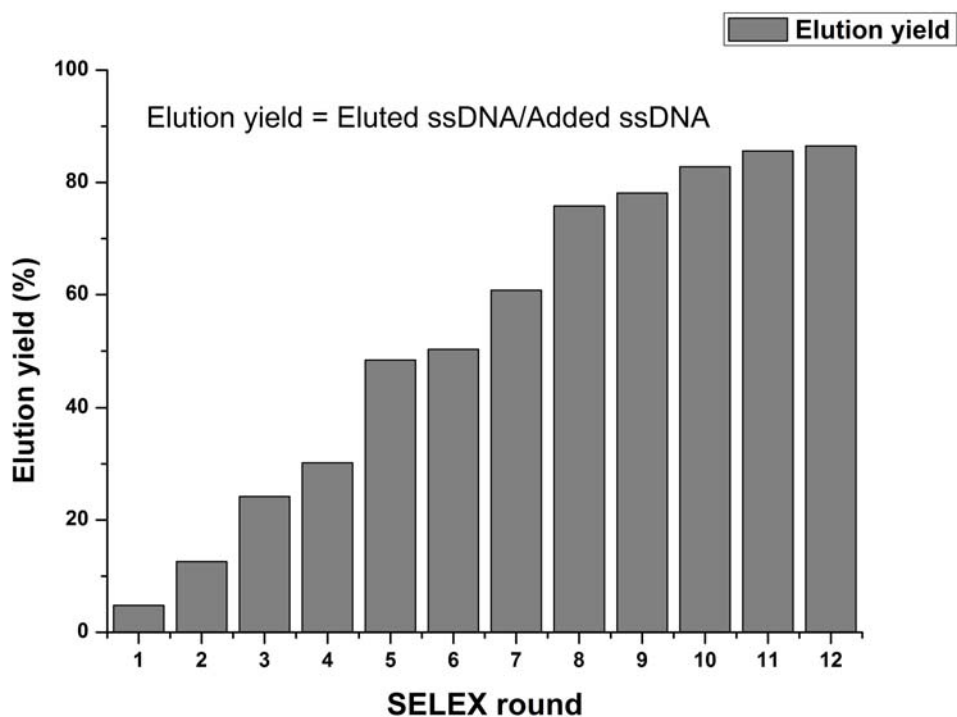

**Fig. S1.** Monitoring the progression of the selection approach by evaluating the elution yield of each ssDNA pool bound to the target exotoxin. The rounds of 4, 5, 7, 8, 10 and 11 were negative-selection using bare magnetic beads. The rounds of 6, 9 and 12 were counter-selection using SEC1-coated magnetic beads instead.

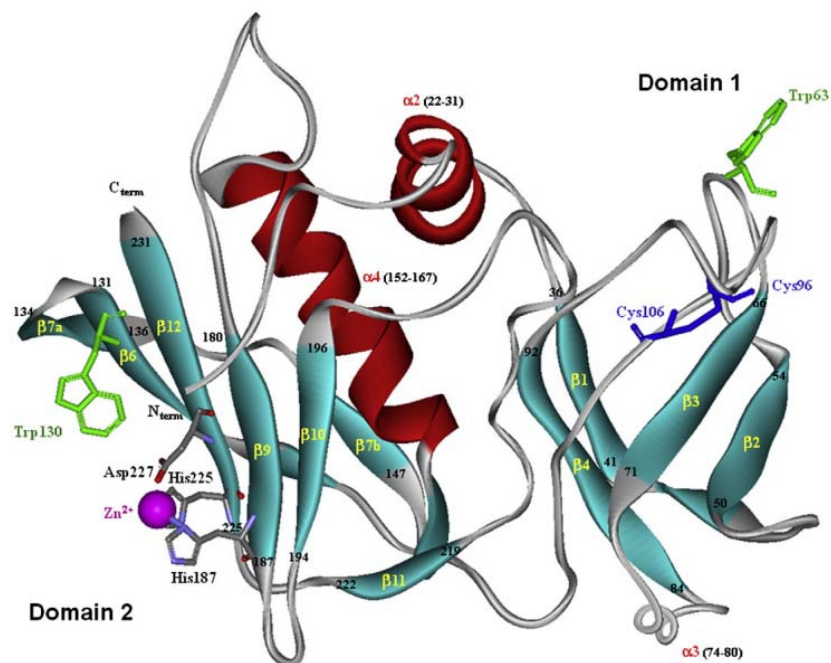

**Fig. S2.** Ribbon-type representation of the crystal structure of staphylococcal enterotoxin A (code pdb: 1SXT; Schad et al.<sup>1</sup>) drawn using Weblab ViewerPro (version 3.7, Molecular Simulation Inc.). The  $\beta$ -strands and  $\alpha$ -helices are drawn in blue (or light grey) and red (or dark grey), respectively. The secondary structural elements along the SEA sequence are indicated. The primary amino acid residues belonging to the  $Zn^{2+}$  binding site (His187, His225 and Asp227), the disulfide bridge (Cys96–Cys106) and the tryptophan residues (Trp63 and Trp130) are indicated.

1. I. Z. E.M.Schad, V.N.Zaitsev, *The EMBO Journal*, 1995, **14**, 3292-3301.
